# Supplementary material for: Multiple Single-Cell Genomes Provide Insight into Functions of Uncultured Deltaproteobacteria in the Human Oral Cavity
Source: PubMed Central journal article supplement (PMC3608642; doi:10.1371/journal.pone.0059361), 2013-03-26

Number of Homologous Genes

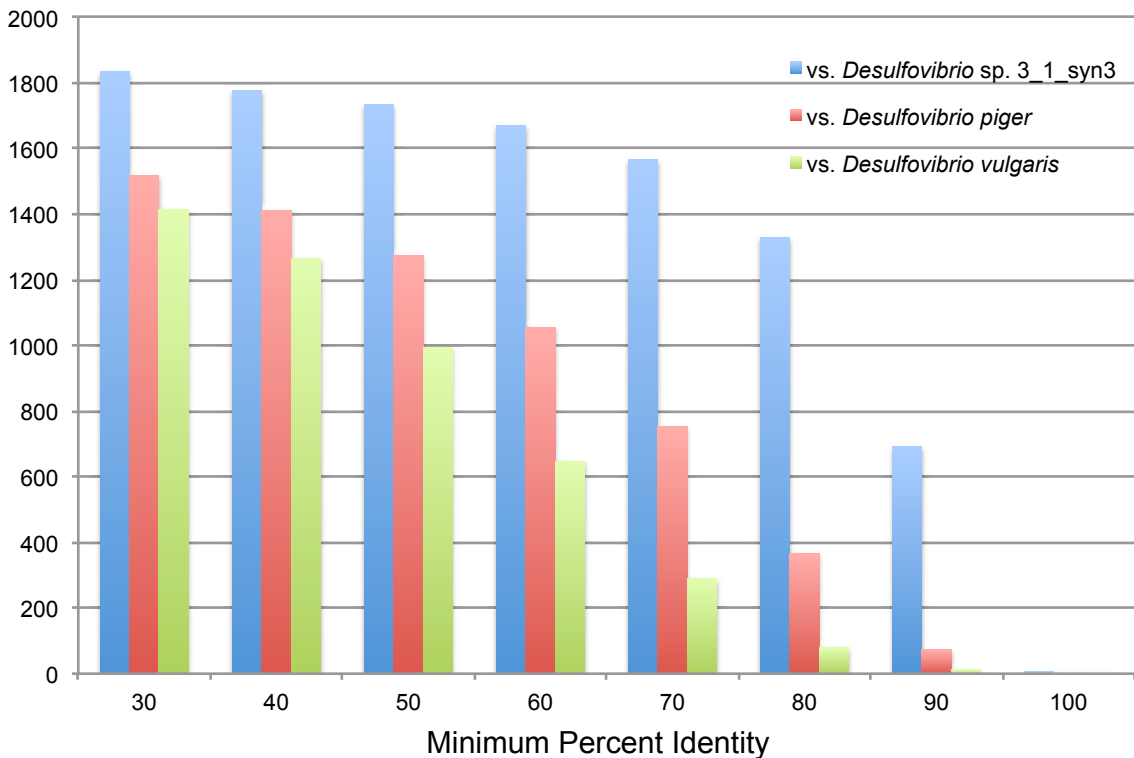

Supplement: pone.0059361.s002.pdf [file pone.0059361.s002.pdf]
